# Supplementary material
Source: HighWire-hosted journal article supplement (https://www.rcpjournals.org/highwire/filestream/13931/field_highwire_adjunct_files/0/King_suplementary_material_S1.pdf)
Supplement: King_suplementary_material_S1.pdf [file King_suplementary_material_S1.pdf]

## Supplementary material S1

### Case by case description as to why patients with a WHO-PS of 1 and 2 were managed with BSC

| CASE                                 | Reasons for BSC approach                                                                                                |
|--------------------------------------|-------------------------------------------------------------------------------------------------------------------------|
| Case 1: WHO-PS 1, Stage IV disease.  | Extensive brain metastases<br>Serum estimated glomerular filtration rate <30<br>No targetable mutations                 |
| Case 2: WHO PS-2, Stage IV disease.  | Admitted with acute stroke during initial cancer workup. Background of Parkinson's Disease. WHO PS deteriorated rapidly |
| Case 3: WHO-PS1, Stage IV disease    | Deteriorated rapidly following initial appointment and died before further investigation                                |
| Case 4: WHO-PS 1, Stage IV disease   | Serum estimated glomerular filtration rate 20.<br>No targetable mutations.                                              |
| Case 5: WHO-PS 1, Stage IV disease   | Myocardial infarction 2 weeks prior to diagnosis with severe left ventricular systolic dysfunction on echocardiogram    |
| Case 6: WHO PS, Stage IV disease     | Multiple brain metastases, Serum estimated glomerular filtration rate 25.                                               |
| Case 7: WHO-PS 2, Stage 1 disease    | Out of hospital cardiac arrest on day of MDT meeting. Treatment withdrawn on Intensive care unit.                       |
| Case 8: WHO-PS 2, Stage IV disease   | Patient 91 with multiple comorbidities and, no targetable mutations.                                                    |
| Case 9: WHO-PS2, Stage IV disease    | High volume brain metastases, rapidly declined on pathway                                                               |
| Case 10: WHO-PS2, Stage IV disease   | Declined further investigation or treatment and did not attend follow ups                                               |
| Case 11: WHO-PS2, Stage IV disease   | No targetable mutations, patient 92, joint decision for BSC                                                             |
| Case 12: WHO-PS 2, Stage IV disease  | No targetable mutations, patient 91, joint decision for BSC                                                             |
| Case 13: WHO -PS 2, Stage II disease | 95 year old, offered assessment for more radical treatment but patient declined                                         |
| Case 14: WHO-PS2, Stage IV disease   | Severe emphysema and recurrent infections with multiple antibiotic courses                                              |
| Case 15: WHO-PS2, Stage IV disease   | Patient declined further investigations.                                                                                |
